# Supplementary material for: Oral Administration of Vitamin D3 Prevents Corneal Damage in a Knock-Out Mouse Model of Sjögren’s Syndrome
Source: MDPI journal article supplement (doi:10.3390/biomedicines11020616), 2023-02-18
Supplement: s1 [file s1]

# Oral Administration of Vitamin D3 Prevents Corneal Damage in a Knock-Out Mouse Model of Sjögren's Syndrome

Maria Consiglia Trotta <sup>1,†</sup>, Hildegard Herman <sup>2,‡</sup>, Cornel Balta <sup>2</sup>, Marcel Rosu <sup>2</sup>, Alina Ciceu <sup>2</sup>, Bianca Mladin <sup>2</sup>, Carlo Gesualdo <sup>3</sup>, Caterina Claudia Lepre <sup>1</sup>, Marina Russo <sup>1</sup>, Francesco Petrillo <sup>4</sup>, Gorizio Pieretti <sup>3</sup>, Francesca Simonelli <sup>3</sup>, Settimio Rossi <sup>3,\*</sup>, Michele D'Amico <sup>1,‡</sup> and Anca Hermenean <sup>2,‡</sup>

<sup>1</sup> Department of Experimental Medicine, University of Campania "Luigi Vanvitelli", Via Santa Maria di Costantinopoli 16, 80138 Naples, Italy

<sup>2</sup> "Aurel Ardelean" Institute of Life Sciences, Vasile Goldis Western University of Arad, 86 Revolutiei Av., 310414 Arad, Romania

<sup>3</sup> Multidisciplinary Department of Medical, Surgical and Dental Sciences, University of Campania "Luigi Vanvitelli", Via Luigi de Crecchio 6, 80138 Naples, Italy

<sup>4</sup> PhD Course in Translational Medicine, Department of Experimental Medicine, University of Campania "Luigi Vanvitelli", 80138 Naples, Italy

\* Correspondence: settimio.rossi@unicampania.it

† These authors contributed equally to this work.

‡ These authors contributed equally to this work.

## SUPPLEMENTARY MATERIALS

Table S1. Serum DHVD3 levels (ng/ml) in female Balb-c mice at 6 (6w) and 12 weeks (12w) of age.

| Balb-c | Serum DHVD3<br>(ng/L) |
|--------|-----------------------|
| 6w     | 8.5 ± 0.9             |
| 12w    | 9.2 ± 1.2             |

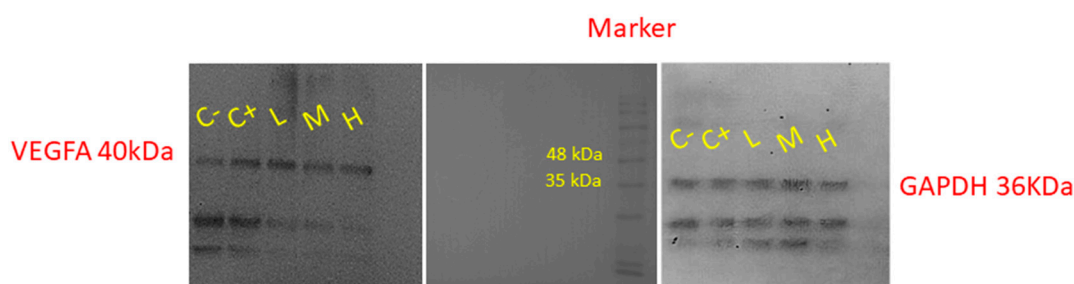

Figure S1. Uncropped images of representative VEGFA and GAPDH Western Blotting membranes.
